# Supplementary material for: Predicting folding pathways between RNA conformational structures guided by RNA stacks
Source: PubMed Central journal article supplement (PMC3402921; doi:10.1186/1471-2105-13-s3-s5), 2012-03-21
Supplement: 1471-2105-13-S3-S5-S1.pdf [file 1471-2105-13-S3-S5-S1.pdf]

# Supplementary Data

Yuan Li and Shaojie Zhang  
Department of Electrical Engineering and Computer Science  
University of Central Florida  
Orlando, FL, USA, 32816-2362

## 1 The Discrete Probability Distribution

We define a discrete probability distribution (similar to the discrete Gaussian distribution) over a sample space. Let  $X$  be a random variable over  $\mathbb{R}$  following a normal distribution with mean  $\mu$  ( $\mu = 0$ ) and variance  $\sigma^2$ . Consider a sample space of  $n$  distinguishable objects  $\mathcal{V} = \{v_1, v_2, \dots, v_n\}$ . The  $\mathcal{V}$ -distribution selects a sample  $v$  with probability  $Pr(v)$  ( $Pr(v = v_i) = Pr((i-1)/n \leq |X| \leq i/n)$  for  $1 \leq i \leq n-1$  and  $Pr(v = v_n) = Pr(|X| \geq (n-1)/n)$ ). The default value of  $\sigma^2$  is  $1/12$ , so that  $Pr(|X| \geq 1) = 0.0005$ . Consider the set  $\{p_l, \dots, p_{(l+n-1)}\}$  and construct  $\mathcal{V}$  as follows. If  $a_t$  is an addition operation, then  $\mathcal{V} = \{v_1 = p_l, \dots, v_{(l+n-1)} = p_u\}$ . If  $a_t$  is a deletion operation, then  $\mathcal{V} = \{v_1 = p_{(l+n-1)}, \dots, v_n = p_l\}$ . The actions chain  $q$  is chosen from  $\mathcal{V}$  with the  $\mathcal{V}$ -distribution.

## 2 Performance of RNAEAPath using different control parameters.

The performance of RNAEAPath using different control parameters is evaluated. Table 1 shows the energy barriers of the best folding pathways found by RNAEAPath over 5 runs with the number of the preserved top offsprings  $\ell_1$  ( $\ell_1$  varies from 1 to 16). Table 2 shows the performance of RNAEAPath over 5 runs with the expected size of population  $\ell_3$  ( $\ell_3$  varies from 80 to 120). Table 3 shows the performance of RNAEAPath over 5 runs with the number of offsprings  $\mathfrak{L}$  (for each individual  $\mathfrak{L}$  varies from 80 to 120).

Table 1: Energy barriers of the best folding pathways found by RNAEAPath over 5 runs with different control parameters:  $\ell_1$ , the number of top offsprings preserved in the next generation, varies from 1 to 16. The energies are measured in kcal/mol.

| Instance     | Control Parameter: $\ell_1$ |              |              |              |              |              |
|--------------|-----------------------------|--------------|--------------|--------------|--------------|--------------|
|              | 1                           | 4            | 7            | 10           | 13           | 16           |
| rb1          | <b>22</b>                   | <b>22</b>    | <b>22</b>    | <b>22</b>    | <b>22</b>    | <b>22</b>    |
| rb2          | 7.4                         | 7.5          | <b>10</b>    | <b>6.5</b>   | <b>6.5</b>   | <b>6.5</b>   |
| rb3          | <b>16.7</b>                 | <b>16.7</b>  | 17.1         | <b>16.7</b>  | <b>16.7</b>  | <b>16.7</b>  |
| rb4          | <b>16.9</b>                 | <b>16.9</b>  | <b>16.9</b>  | <b>16.9</b>  | <b>16.9</b>  | <b>16.9</b>  |
| rb5          | <b>21.44</b>                | <b>21.44</b> | <b>21.44</b> | <b>21.44</b> | <b>21.44</b> | <b>21.44</b> |
| hok          | 20.2                        | <b>20.1</b>  | 20.2         | <b>20.1</b>  | <b>20.1</b>  | <b>20.1</b>  |
| SL           | 13                          | 13           | <b>12.9</b>  | <b>12.9</b>  | 13           | 13           |
| attenuator   | 8.6                         | <b>8.5</b>   | <b>8.5</b>   | <b>8.5</b>   | <b>8.5</b>   | <b>8.5</b>   |
| s15          | <b>6.6</b>                  | 7.1          | 7.1          | 7.1          | <b>6.6</b>   | 7.1          |
| sbox leader  | <b>5.2</b>                  | <b>5.2</b>   | <b>5.2</b>   | <b>5.2</b>   | <b>5.2</b>   | <b>5.2</b>   |
| thiM leader  | <b>12.3</b>                 | <b>12.3</b>  | <b>12.3</b>  | <b>12.3</b>  | <b>12.3</b>  | <b>12.3</b>  |
| ms2          | <b>6.6</b>                  | <b>6.6</b>   | <b>6.6</b>   | <b>6.6</b>   | <b>6.6</b>   | <b>6.6</b>   |
| HDV          | <b>16.7</b>                 | 16.8         | <b>16.7</b>  | 16.8         | 16.8         | 16.8         |
| dsrA         | <b>8</b>                    | <b>8</b>     | <b>8</b>     | <b>8</b>     | <b>8</b>     | <b>8</b>     |
| ribD leader  | <b>9.5</b>                  | <b>9.5</b>   | <b>9.5</b>   | <b>9.5</b>   | <b>9.5</b>   | <b>9.5</b>   |
| amv          | <b>5.74</b>                 | <b>5.74</b>  | <b>5.74</b>  | <b>5.74</b>  | <b>5.74</b>  | <b>5.74</b>  |
| alpha operon | 6.5                         | <b>6.1</b>   | <b>6.1</b>   | <b>6.1</b>   | <b>6.1</b>   | <b>6.1</b>   |
| HIV-1 leader | <b>8.9</b>                  | <b>8.9</b>   | <b>8.9</b>   | <b>8.9</b>   | <b>8.9</b>   | <b>8.9</b>   |

Table 2: Energy barriers of the best folding pathways found by RNAEAPath over 5 runs with different control parameter:  $\ell_3$ , the size of population in each generation varies from 80 to 120. The energies are measured in kcal/mol.

| Instance     | Control Parameter: $\ell_3$ |              |              |              |              |
|--------------|-----------------------------|--------------|--------------|--------------|--------------|
|              | 80                          | 90           | 100          | 110          | 120          |
| rb1          | <b>22</b>                   | <b>22</b>    | <b>22</b>    | <b>22</b>    | 22.4         |
| rb2          | <b>6.5</b>                  | 7.4          | <b>6.5</b>   | <b>6.5</b>   | <b>6.5</b>   |
| rb3          | <b>16.7</b>                 | 17.1         | <b>16.7</b>  | <b>16.7</b>  | <b>16.7</b>  |
| rb4          | <b>16.9</b>                 | <b>16.9</b>  | <b>16.9</b>  | <b>16.9</b>  | <b>16.9</b>  |
| rb5          | <b>21.44</b>                | <b>21.44</b> | <b>21.44</b> | <b>21.44</b> | <b>21.44</b> |
| hok          | <b>20.1</b>                 | 20.9         | <b>20.1</b>  | 20.7         | <b>20.1</b>  |
| SL           | 13                          | 13           | <b>12.9</b>  | 13           | 13           |
| attenuator   | <b>8.5</b>                  | 8.6          | <b>8.5</b>   | 8.6          | <b>8.5</b>   |
| s15          | 7.1                         | <b>6.6</b>   | 7.1          | <b>6.6</b>   | <b>6.6</b>   |
| sbox leader  | <b>5.2</b>                  | <b>5.2</b>   | <b>5.2</b>   | <b>5.2</b>   | <b>5.2</b>   |
| thiM leader  | 12.3                        | 12.3         | 12.3         | <b>12</b>    | <b>12</b>    |
| ms2          | <b>6.6</b>                  | <b>6.6</b>   | <b>6.6</b>   | <b>6.6</b>   | <b>6.6</b>   |
| HDV          | 16.8                        | 16.8         | 16.8         | <b>16.7</b>  | 16.8         |
| dsrA         | <b>8</b>                    | <b>8</b>     | <b>8</b>     | <b>8</b>     | <b>8</b>     |
| ribD leader  | <b>9.5</b>                  | <b>9.5</b>   | <b>9.5</b>   | <b>9.5</b>   | <b>9.5</b>   |
| amv          | <b>5.74</b>                 | <b>5.74</b>  | <b>5.74</b>  | <b>5.74</b>  | <b>5.74</b>  |
| alpha operon | <b>6.1</b>                  | <b>6.1</b>   | <b>6.1</b>   | <b>6.1</b>   | <b>6.1</b>   |
| HIV-1 leader | <b>8.9</b>                  | <b>8.9</b>   | <b>8.9</b>   | <b>8.9</b>   | <b>8.9</b>   |

Table 3: Energy barriers of the best folding pathways found by RNAEAPath over 5 runs with different control parameters:  $\mathcal{L}$ , the number of offsprings that each individual should generate varies from 80 to 120. The energies are measured in kcal/mol.

| Instance     | Control Parameter: $\mathcal{L}$ |              |              |              |              |
|--------------|----------------------------------|--------------|--------------|--------------|--------------|
|              | 80                               | 90           | 100          | 110          | 120          |
| rb1          | <b>22</b>                        | <b>22</b>    | <b>22</b>    | <b>22</b>    | <b>22</b>    |
| rb2          | 7.4                              | <b>6.5</b>   | <b>6.5</b>   | <b>6.5</b>   | <b>6.5</b>   |
| rb3          | 17.5                             | <b>16.7</b>  | <b>16.7</b>  | <b>16.7</b>  | <b>16.7</b>  |
| rb4          | <b>16.9</b>                      | <b>16.9</b>  | <b>16.9</b>  | <b>16.9</b>  | <b>16.9</b>  |
| rb5          | <b>21.44</b>                     | <b>21.44</b> | <b>21.44</b> | <b>21.44</b> | <b>21.44</b> |
| hok          | 20.5                             | <b>20.1</b>  | <b>20.1</b>  | <b>20.1</b>  | <b>20.1</b>  |
| SL           | <b>12.9</b>                      | 13           | <b>12.9</b>  | 13           | 13           |
| attenuator   | <b>8.5</b>                       | <b>8.5</b>   | <b>8.5</b>   | 8.6          | <b>8.5</b>   |
| s15          | 7.1                              | <b>6.6</b>   | 7.1          | 7.1          | 7.1          |
| sbox leader  | <b>5.2</b>                       | <b>5.2</b>   | <b>5.2</b>   | <b>5.2</b>   | <b>5.2</b>   |
| thiM leader  | 12.3                             | 12.3         | 12.3         | <b>12</b>    | 12.1         |
| ms2          | <b>6.6</b>                       | <b>6.6</b>   | <b>6.6</b>   | <b>6.6</b>   | <b>6.6</b>   |
| HDV          | <b>16.7</b>                      | 16.8         | 16.8         | <b>16.7</b>  | 16.8         |
| dsrA         | <b>8</b>                         | <b>8</b>     | <b>8</b>     | <b>8</b>     | <b>8</b>     |
| ribD leader  | <b>9.5</b>                       | <b>9.5</b>   | <b>9.5</b>   | <b>9.5</b>   | <b>9.5</b>   |
| amv          | <b>5.74</b>                      | <b>5.74</b>  | <b>5.74</b>  | <b>5.74</b>  | <b>5.74</b>  |
| alpha operon | <b>6.1</b>                       | <b>6.1</b>   | <b>6.1</b>   | <b>6.1</b>   | <b>6.1</b>   |
| HIV-1 leader | <b>8.9</b>                       | <b>8.9</b>   | <b>8.9</b>   | <b>8.9</b>   | <b>8.9</b>   |

### 3 Running Time

Table 4 shows the running time of RNAEAPath on 18 conformational switches using the default parameters. The tests are performed on a 32 bit, 2.4 GHz Quad-processor, 3.2GB memory computer, the operating system is Fedora 11. The minimum execution time is 1 minute (in the case of rb4) and 421 minutes (in the case of hok), and on average RNAEAPath terminates in 43 minutes.

Table 4: Running time of RNAEAPath on 18 conformational switches using the default parameters.

| Instance     | Running Time (minutes) |
|--------------|------------------------|
| rb1          | 34                     |
| rb2          | 16                     |
| rb3          | 22                     |
| rb4          | 1                      |
| rb5          | 17                     |
| hok          | 421                    |
| SL           | 13                     |
| attenuator   | 13                     |
| s15          | 10                     |
| sbox leader  | 20                     |
| thim leader  | 45                     |
| ms2          | 10                     |
| HDV          | 20                     |
| dsrA         | 13                     |
| ribD leader  | 52                     |
| amv          | 14                     |
| alpha operon | 15                     |
| HIV-1 leader | 34                     |

## **4 The Best Folding Pathways Found by RNAEAPath**

The best folding pathways between two conformational structures of 18 riboswitches found by RNAEAPath over 5 runs using the default parameters are shown as follows.













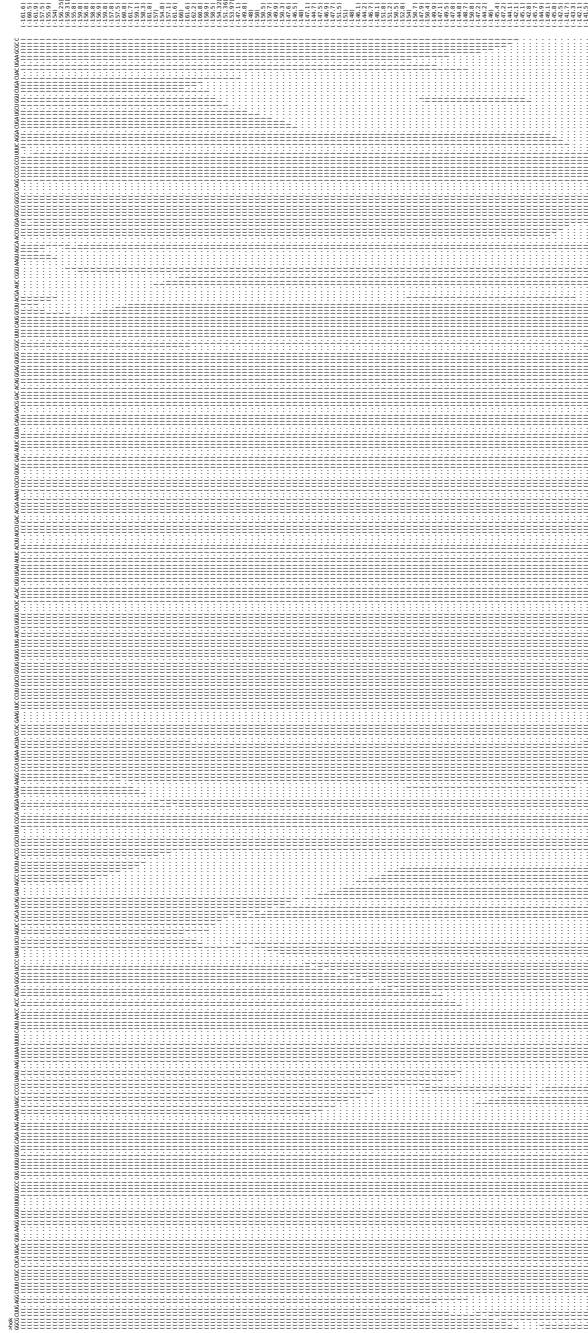

Figure 6: The best folding pathway between two conformational structures of hok found by RNAEAPath over 5 runs using the default parameters.

```

>SplicedLeaderAB
AACUAAAAACAAUUUUUGAAGAACAGUUUCUGUACUUCUUAUUGGUUAUGAGACUUC
..(((.....(((.....))))))..... (-10.7)
..(((.....(((.....))))))..... (-7.8)
..(((.....(((.....))))))..... (-10.1)
..(((.....(((.....))))))..... (-6.1)
..(((.....(((.....))))))..... (-7.4)
..(((.....(((.....))))))..... (-8.1)
..(((.....(((.....))))))..... (-5.82)
..(((.....(((.....))))))..... (-2.56)
..(((.....(((.....))))))..... (-1.53)
..(((.....(((.....))))))..... (-0.01)
..(((.....(((.....))))))..... (-0.2)
..(((.....(((.....))))))..... (1.5)
..(((.....(((.....))))))..... (0.7)
..(((.....(((.....))))))..... (-0.7)
..(((.....(((.....))))))..... (0.2)
..(((.....(((.....))))))..... (0.2)
..(((.....(((.....))))))..... (1.8)
..(((.....(((.....))))))..... (1.9)
..(((.....(((.....))))))..... (0.1)
..(((.....(((.....))))))..... (2.2)
..(((.....(((.....))))))..... (1.4)
..(((.....(((.....))))))..... (1.9)
..(((.....(((.....))))))..... (-2.6)
..(((.....(((.....))))))..... (0.8)
..(((.....(((.....))))))..... (-0.9)
..(((.....(((.....))))))..... (-2.4)
..(((.....(((.....))))))..... (-2.4)
..(((.....(((.....))))))..... (-3)
..(((.....(((.....))))))..... (-3.9)
..(((.....(((.....))))))..... (-7.1)
..(((.....(((.....))))))..... (-7.3)
..(((.....(((.....))))))..... (-9)
The optimal folding pathways has barrier energy 12.9.

```

Figure 7: The best folding pathway between two conformational structures of SL found by RNAEAPath over 5 runs using the default parameters.



```

>s15
CUGGGAUCGCUGAAUUAGAGAUCCGGUCCUUIUCAUUCUUAUAUACUUUUGGAGUUUUAAAUGUCUCUAAGUACU
..(((.(.....))))).....(((.(.....)))))... (-17.9)
..(((.(.....))))).....(((.(.....)))))... (-14.3)
..(((.(.....))))).....(((.(.....)))))... (-17.9)
..(((.(.....))))).....(((.(.....)))))... (-13.9)
..(((.(.....))))).....(((.(.....)))))... (-17.9)
..(((.(.....))))).....(((.(.....)))))... (-17.2)
..(((.(.....))))).....(((.(.....)))))... (-12.4)
..(((.(.....))))).....(((.(.....)))))... (-11.5)
..(((.(.....))))).....(((.(.....)))))... (-12.6)
..(((.(.....))))).....(((.(.....)))))... (-10.8)
..(((.(.....))))).....(((.(.....)))))... (-14.4)
..(((.(.....))))).....(((.(.....)))))... (-15)
The optimal folding pathway has barrier energy 7.1.

```

Figure 9: The best folding pathway between two conformational structures of s15 found by RNAEAPath over 5 runs using the default parameters.
